# Supplementary material for: Study of the Lipolysis Effect of Nanoliposome-Encapsulated Ganoderma lucidum Protein Hydrolysates on Adipocyte Cells Using Proteomics Approach
Source: MDPI journal article supplement (doi:10.3390/foods10092157), 2021-09-12
Supplement: s1 [file s1]

## Supplementary Figures

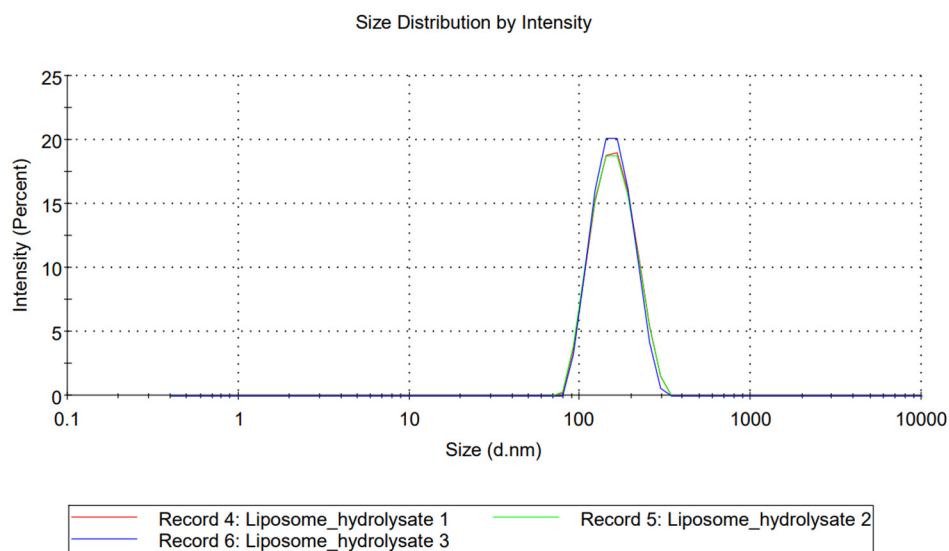

**Figure S1:** Dynamic light scattering (DLS) analysis showed size distribution of loaded liposome particle at 25 °C in the PBS solution (n=3).

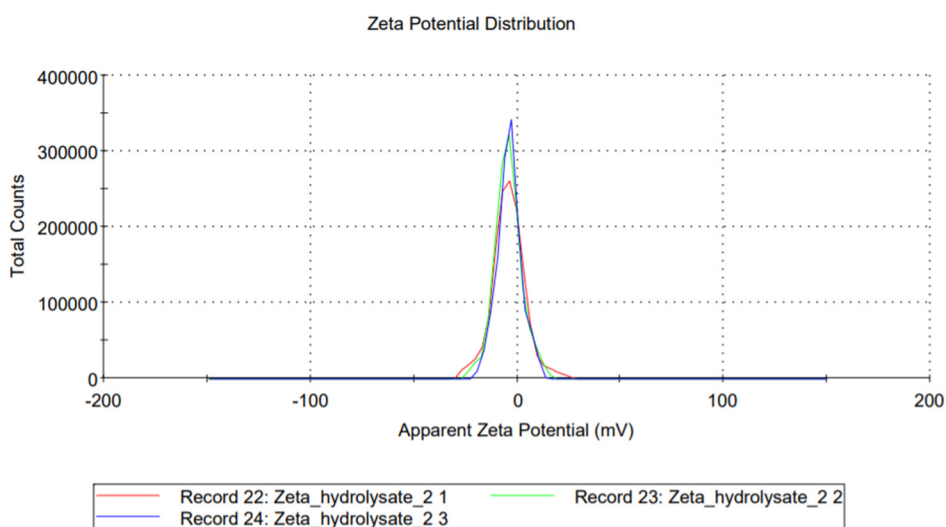

**Figure S2:** Dynamic light scattering (DLS) analysis showed zeta-potential distribution of loaded liposome particle at 25 °C in the PBS solution (n=3).

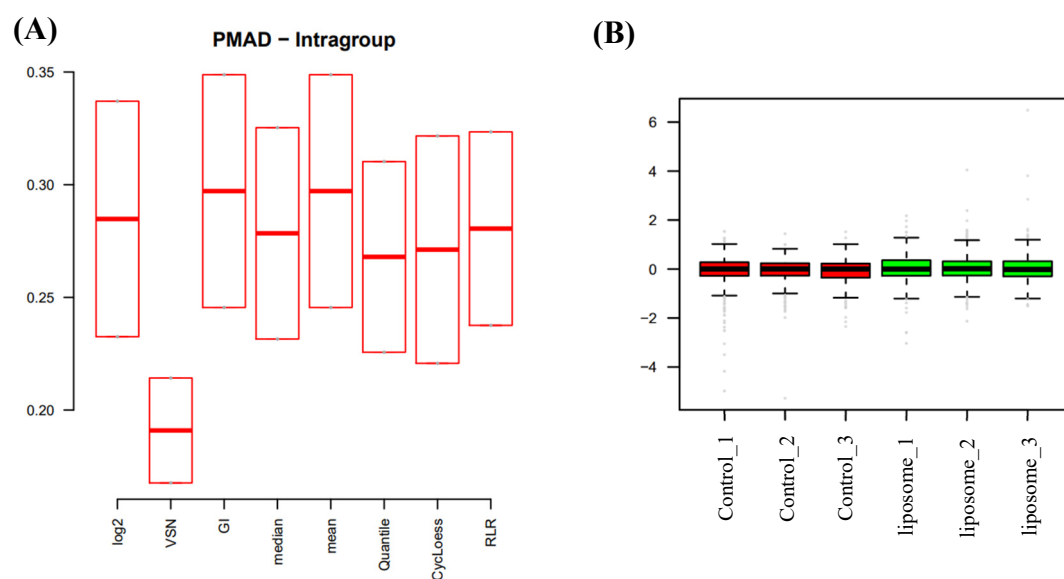

**Supplementary Figure S3:** Intragroup variation was measured with pooled intragroup median absolute deviation (PMAD) of the identified proteins (A) and Relative Log Expression (RLE) plots (B).
